# Supplementary material for: Modeling Analysis of a Polygeneration Plant Using a CeO2/Ce2O3 Chemical Looping
Source: MDPI journal article supplement (doi:10.3390/ma16010315), 2022-12-29
Supplement: s1 [file s1]

## Supplementary Material

# Modeling Analysis of a Polygeneration Plant Using a $\text{CeO}_2/\text{Ce}_2\text{O}_3$ Chemical Looping

Greta Magnolia <sup>1</sup>, Massimo Santarelli <sup>1</sup>, Domenico Ferrero <sup>1</sup> and Davide Papurello <sup>1,2,\*</sup>

<sup>1</sup> Department of Energy (DENERG), Politecnico di Torino, Corso Duca Degli Abruzzi, 24, 10129 Turin, Italy

<sup>2</sup> Energy Center, Politecnico di Torino, Via Borsellino 38/18, 10129 Turin, Italy

\* Correspondence: [davide.papurello@polito.it](mailto:davide.papurello@polito.it); Tel.: +39-3402351692

**Table S1.** Particle size distribution of the ceria as a function of the frequency obtained from ELPI measurements [63].

| Particle diameter                      | Frequency of particles (%) |
|----------------------------------------|----------------------------|
| 95 nm–264 nm                           | 11.4                       |
| 264 nm–384 nm                          | 17                         |
| 384 nm–616 nm                          | 35                         |
| 616 nm–953 nm                          | 23                         |
| 953 nm–1.61 $\mu\text{m}$              | 9                          |
| 1.61 $\mu\text{m}$ –2.4 $\mu\text{m}$  | 3                          |
| 2.4 $\mu\text{m}$ –4.01 $\mu\text{m}$  | 1                          |
| 4.01 $\mu\text{m}$ –6.71 $\mu\text{m}$ | 0.23                       |
| 6.71 $\mu\text{m}$ –9.96 $\mu\text{m}$ | 0.37                       |

**Table S2.** Cyclones' characteristics in Aspen Plus [65].

| Calculation method         | Leith-Licht  |
|----------------------------|--------------|
| Type                       | Stairmand-HE |
| Separation efficiency      | 0.9          |
| Maximum pressure drop      | 0.015 bar    |
| Maximum number of cyclones | 100          |

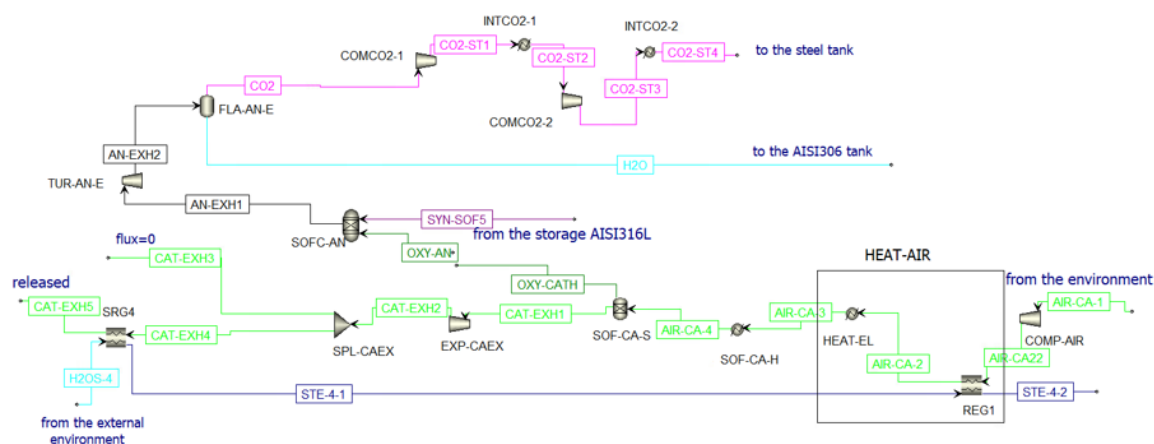

Figure S1. SOFC scheme in Aspen Plus when the CL is in OFF-state.

Table S3. Thermal balance of the chemical looping.

| COMPONENT                | HEAT DUTY [MW <sub>t</sub> ] |
|--------------------------|------------------------------|
| <b>Reduction reactor</b> |                              |
| Reduction reaction       | -114.0                       |
| Methane stream           | -20.12                       |
| Total ceria stream       | -7.39                        |
| <b>Oxidation reactor</b> | 32.97                        |

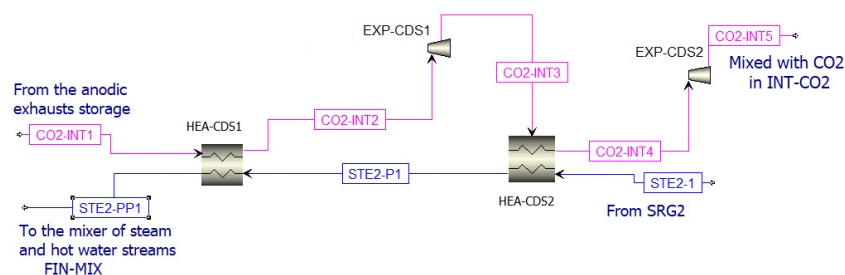

Figure S2. Thermal balance of HEA-CDS1 and HEA-CDS2 in Aspen Plus.

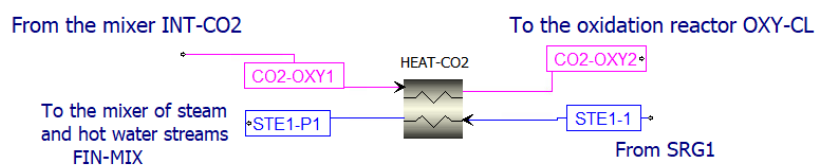

Figure S3. Thermal balance of HEAT-CO2 in Aspen Plus.

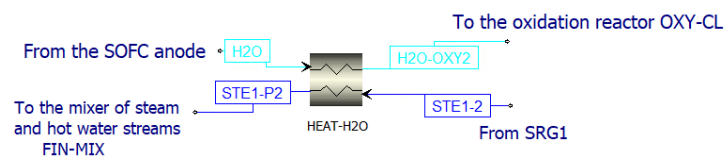

Figure S4. Thermal balance of HEAT-H2O in Aspen Plus.

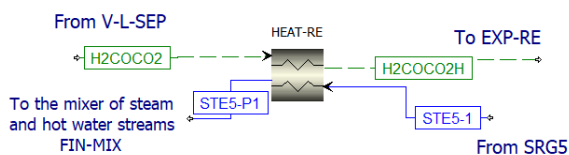

Figure S5. Thermal balance of HEAT-RE in Aspen Plus.

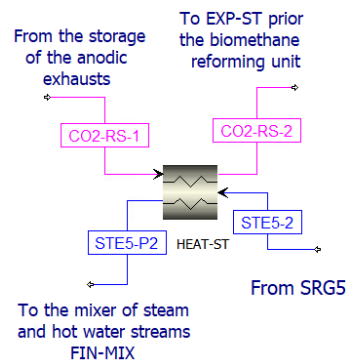

Figure S6. Thermal balance of HEAT-ST in Aspen Plus.

Table S4. Thermal balance of the reforming unit.

| COMPONENT         |                        | HEAT DUTY [MW <sub>i</sub> ] |         |
|-------------------|------------------------|------------------------------|---------|
| Reforming reactor | Reforming reaction     |                              | −126.74 |
|                   | Methane stream         |                              | −11.53  |
|                   | CO <sub>2</sub> stream |                              | −14.15  |

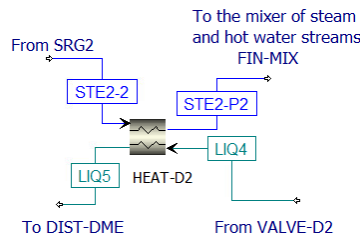

Figure S7. Thermal balance HEAT-D2 in Aspen Plus.

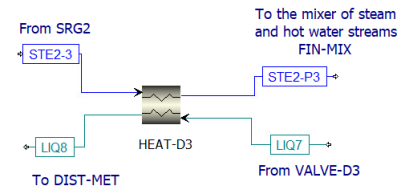

Figure S8. Thermal balance of HEAT-D3 in Aspen Plus.

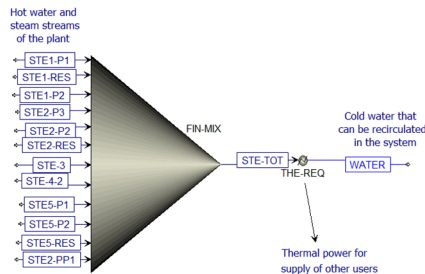

Figure S9. Mixer of the steam and hot water streams of the plant and simulation of the cooling of the output stream (STE-TOT) to obtain useful thermal power (THE-REQ) when CL is in ON-state.

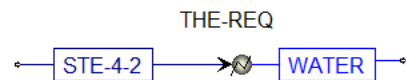

Figure S10. Simulation of the thermal recovery from steam when CL is in OFF-state.

**Table S5.** Comparison of results of the reduction reactor model of this paper with the results reported by Bose et al. [36] at the chosen operating conditions of the solar aided CL.

| Reduction reaction, p = 1 bar |                                   | Bose et al. [36] | Present study |
|-------------------------------|-----------------------------------|------------------|---------------|
| Operating conditions          | Temperature                       | 900–950 °C       | 900 °C        |
|                               | CH <sub>4</sub> /CeO <sub>2</sub> | 0.7–0.8          | 0.8           |
| Produced syngas               | H <sub>2</sub>                    | 63%              | 55%           |
|                               | CO                                | 31%              | 31%           |

**Table S6.** Comparison of the results of the reduction reactor model of this study with the results reported by Warren et al. [54] and by Bose et al. [36] at different operating conditions.

| Reduction reaction, CH <sub>4</sub> /CeO <sub>2</sub> = 0.25 p = 1 bar |                           |       |                 |                  |                 |
|------------------------------------------------------------------------|---------------------------|-------|-----------------|------------------|-----------------|
| Temperature (°C)                                                       | Mole fraction of exit gas |       |                 |                  |                 |
|                                                                        | H <sub>2</sub>            | CO    | CH <sub>4</sub> | H <sub>2</sub> O | CO <sub>2</sub> |
| 900 °C                                                                 |                           |       |                 |                  |                 |
| Warren et al. [54]                                                     | 0.718                     | 0.273 | 0.004           | 0.004            | 0               |
| Bose et al. [36]                                                       | 0.655                     | 0.329 | 0.006           | 0.009            | 0.001           |
| Present study                                                          | 0.585                     | 0.400 | 0.007           | 0.009            | 0.004           |
| 1000 °C                                                                |                           |       |                 |                  |                 |
| Warren et al. [54]                                                     | 0.699                     | 0.301 | 0               | 0                | 0               |
| Bose et al. [36]                                                       | 0.639                     | 0.325 | 0               | 0.028            | 0.008           |
| Present study                                                          | 0.572                     | 0.400 | 0               | 0.028            | 0.010           |

**Table S7.** Comparison of the results of the model of this study with the results reported by Bose et al. [36] for the oxidation of ceria with H<sub>2</sub>O and CO<sub>2</sub>.

| Oxidation reaction, $\dot{n}_{\text{CeO}_2} = 0.5 \frac{\text{kmol}}{\text{h}}$ , p = 1 bar |                                                      |                           |                |       |                                             |
|---------------------------------------------------------------------------------------------|------------------------------------------------------|---------------------------|----------------|-------|---------------------------------------------|
| Temperature (°C)                                                                            | Waste gas flow<br>( $\frac{\text{kmol}}{\text{h}}$ ) | Mole fraction of exit gas |                |       |                                             |
|                                                                                             |                                                      |                           | H <sub>2</sub> | CO    | Other gases +<br>CeO <sub>2</sub> residuals |
| 900 °C                                                                                      | 0.5                                                  | Bose et al. [36]          | 0.440          | 0.450 | 0.110                                       |
|                                                                                             |                                                      | Present study             | 0.406          | 0.411 | 0.183                                       |
|                                                                                             | 0.75                                                 | Bose et al. [36]          | 0.280          | 0.320 | 0.400                                       |
|                                                                                             |                                                      | Present study             | 0.280          | 0.303 | 0.417                                       |
|                                                                                             | 1                                                    | Bose et al. [36]          | 0.210          | 0.240 | 0.550                                       |
|                                                                                             |                                                      | Present study             | 0.212          | 0.238 | 0.550                                       |

## References

- 63 Andersson, M.; Yuan, J.; Sundén, B. SOFC modeling considering electrochemical reactions at the active three phase boundaries. *Int. J. Heat Mass Transf.* **2012**, *55*, 773–788. <https://doi.org/10.1016/j.ijheatmasstransfer.2011.10.032>.
- 65 Stainless Steel Type 316/316L, Rolled Metal Products|Stainless, Aluminum & Specialty Alloys. Available online: <https://rolledmetalproducts.com/stainless-steel-type-316316l/> (accessed on 21 November 2022).
- 36 Xiao, I.; Wu, S.-Y.; Li, Y.-R. Advances in solar hydrogen production via two-step water-splitting thermochemical cycles based on metal redox reactions. *Renew. Energy* **2012**, *41*, 1–12. <https://doi.org/10.1016/j.renene.2011.11.023>.
- 54 Welte, M.; Warren, K.; Scheffe, J.R.; Steinfeld, A. Combined Ceria Reduction and Methane Reforming in a Solar-Driven Particle-Transport Reactor. *Ind. Eng. Chem. Res.* **2017**, *56*, 10300–10308. <https://doi.org/10.1021/acs.iecr.7b02738>.
